# Supplementary material for: The cellular response of the bronchial epithelium shapes the protein corona of inhaled nanoparticles
Source: Royal Society of Chemistry journal article supplement (doi:10.1039/d5nr02590g), 2025-01-01
Supplement: d5nr02590g1.pdf [file d5nr02590g1.pdf]

## Supplementary Information

### The cellular response of the bronchial epithelium shapes the protein corona of inhaled nanoparticles

Daniel Sanchez-Guzman<sup>a</sup>, Chloé Chivé<sup>a</sup>, Olivier Taché<sup>b</sup>, Marco P. Monopoli<sup>c</sup>, Armelle Baeza-Squiban<sup>a</sup>,  
Stéphanie Devineau<sup>a,b,\*</sup>

<sup>a</sup> Université Paris Cité, CNRS, Unité de Biologie Fonctionnelle et Adaptative, 75013 Paris, France

<sup>b</sup> Université Paris-Saclay, CEA, CNRS, NIMBE, 91191 Gif Sur Yvette, France

<sup>c</sup> Department of Chemistry, Royal College of Surgeons in Ireland (RCSI), 123 St Stephen Green, Dublin  
2, Ireland

#### Table of content

- Isolation of the protein corona of AgNPs in bronchial mucus
- Epithelial barrier integrity and metabolic activity of Calu-3 cells exposed to AgNPs
- Proteomic analysis of the cellular protein corona
- Reactome pathway analysis of the cellular protein corona
- Composition of the acellular protein corona
- Composition of the cellular protein corona
- Evolution of the apical secretome of Calu-3 cells exposed to AgNPs

#### Associated files

The full lists of proteins identified in the protein corona of AgNPs in acellular and cellular conditions are provided in the Excel file.

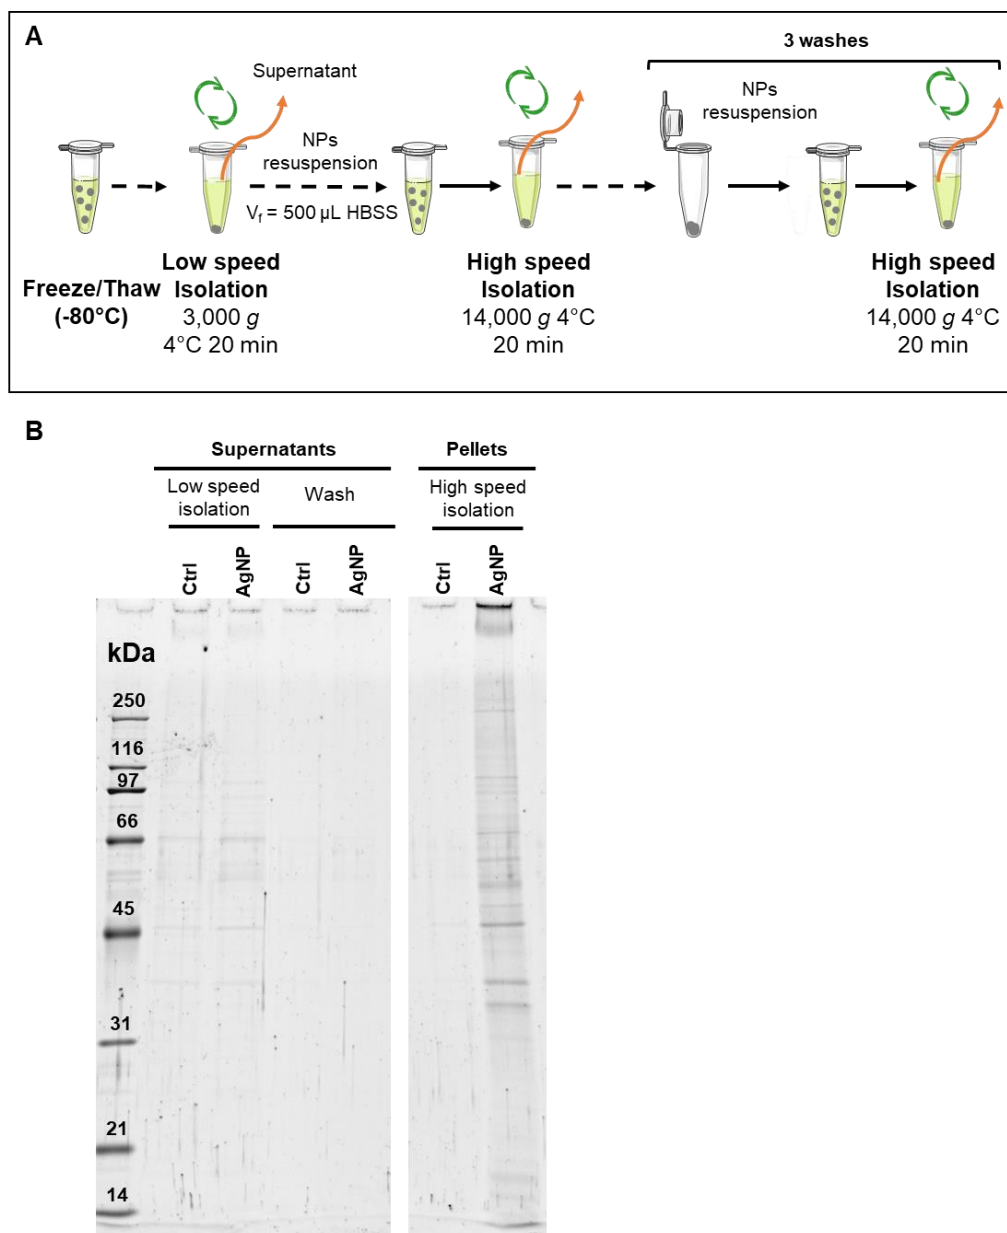

**Figure S1. Isolation of the protein corona of AgNPs in bronchial mucus.** (A) Protocol for the separation of AgNPs from free proteins in the apical secretome of Calu-3 cells. (B) SDS-PAGE of apical secretome supernatants and pellets with and without AgNPs after isolation protocol. The final pellets were analyzed by LC-MS/MS in both conditions to identify proteins forming the protein corona. Proteins detected in the pellet of control samples were excluded from the analysis.

## Materials and methods

**SDS-PAGE.** AgNPs were separated from free proteins in solution by centrifugation at 3,000 g x 2 for 20 min at 4°C, followed by 3 washes in HBSS<sup>Ca2+/Mg2+</sup> and centrifugation at 14,000 g for 20 min at 4°C. The pellet was resuspended in lithium dodecyl sulphate (LDS) loading buffer (NP0007, Invitrogen) supplemented with 50 mM DTT (Thermo Fisher, France) and heated to 100°C for 5 min. SDS-PAGE was performed at 120 V for 1h. Proteins were fixed with 50% methanol and 7% acetic acid in milliQ water for 30 min and stained with SYPRO® Ruby (S12000, Molecular Probes).

**Table S1. Sequence of primers used for RT-qPCR**

| Gene name     | Forward (5'-3')       | Reverse (5'-3')         |
|---------------|-----------------------|-------------------------|
| <i>rpl19</i>  | GGCTCGCCTCTAGTGCCTC   | GGCTCGCCTCTAGTGCCTC     |
| <i>muc5ac</i> | AACTACTCCCAGCCCTGTTC  | GTAGAGGCAGGGGTTGTTCT    |
| <i>alb</i>    | TAGAGAAGTGCTGTGCCGCT  | AGTTGGAGTTGACACTTGGGGT  |
| <i>hmx-1</i>  | CGTTCCTGGTCAACATCC    | CTGTCGCCACCAGAAAG       |
| <i>mt1x</i>   | ACTCCTGCTTCTCCTTGCCTC | TGCACTTGTCTGACGTCCCTT   |
| <i>mt2a</i>   | TCCTGCAAATGCAAAGAGTGC | AAAATCCAGGTTTGTGGAAGTCG |
| <i>il-6</i>   | TGGTCTTTGGAGTTTGAGG   | CGCAGAATGAGATGAGTTGTC   |
| <i>il-8</i>   | AGACAGCAGAGCACACAAGC  | ATGGTTCCTCCGGTGGT       |

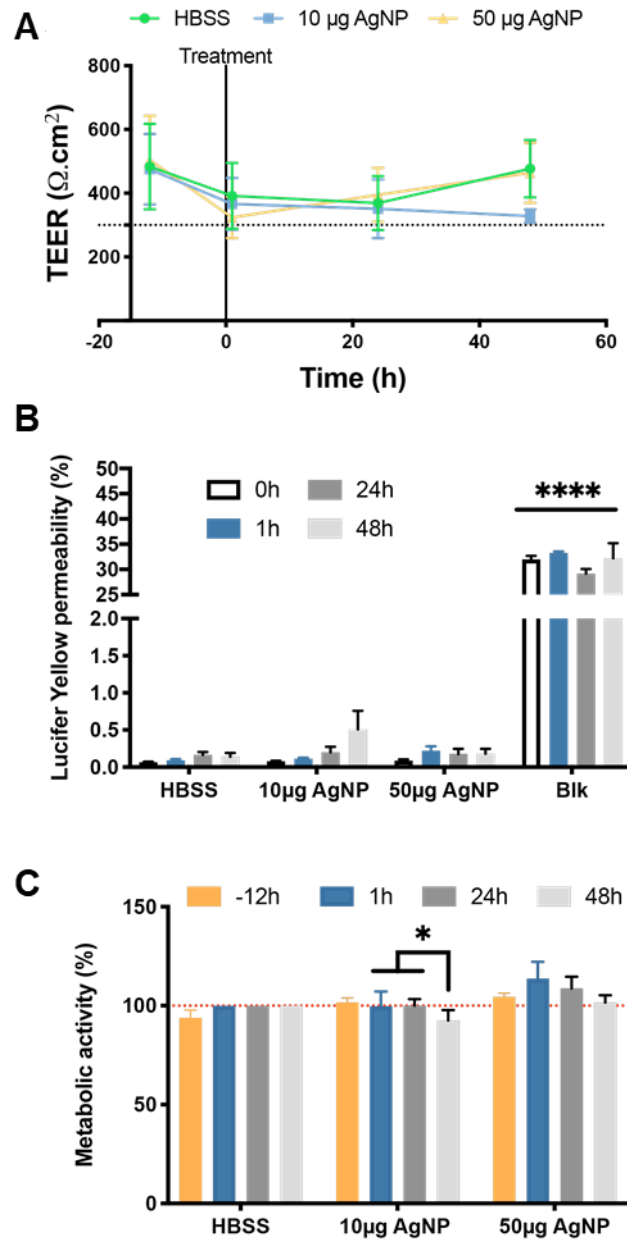

**Figure S2.** Epithelial barrier integrity and metabolic activity of Calu-3 cells exposed to 10 and 50  $\mu\text{g}/\text{cm}^2$  AgNPs at ALI for 1, 24, and 48 h. Control cells were treated with HBSS buffer. (A) TEER (Trans Epithelial Electric Resistance) measured 12h before treatment and after 1, 24, 48h exposure to AgNPs. The minimum value of 300  $\Omega \cdot \text{cm}^2$  for a tight epithelium is indicated by a dashed line. (B) Lucifer yellow permeability assay (Blk: empty well). (C) Alamar blue cell viability assay: metabolic activity normalized to HBSS control measured 12h before treatment and after 1, 24, 48 h exposure to AgNPs. N = 3 (\* p < 0.05).

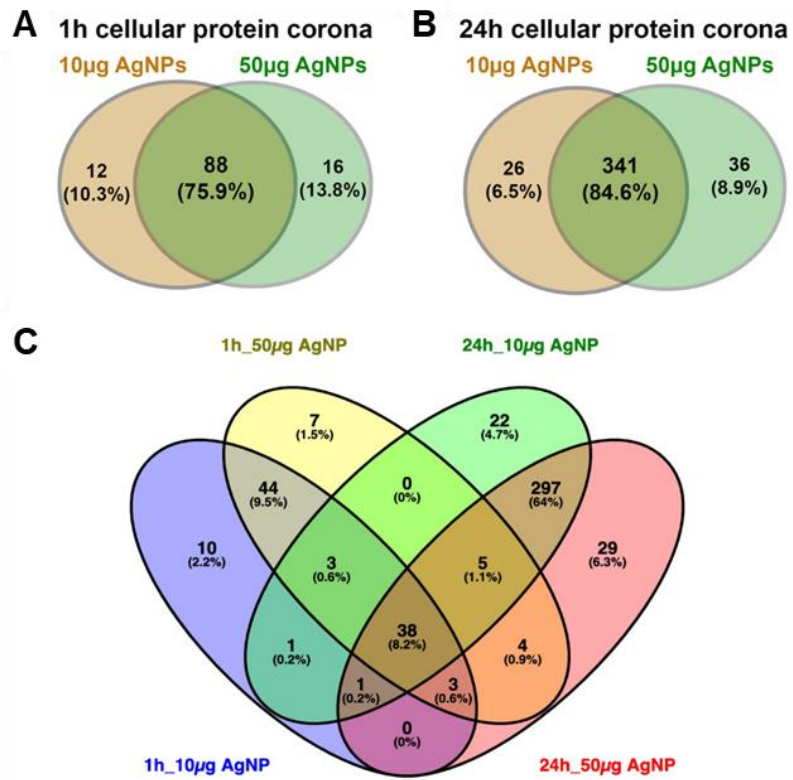

**Figure S3.** Quantitative proteomic analysis of the cellular protein corona after exposure of the bronchial epithelium model to 10 and 50 µg/cm<sup>2</sup>. Comparison of the corona (A) after 1 h exposure as a function of AgNP concentration, (B) after 24 h exposure as a function of AgNP concentration, (C) as a function of both exposure time and AgNP concentration.

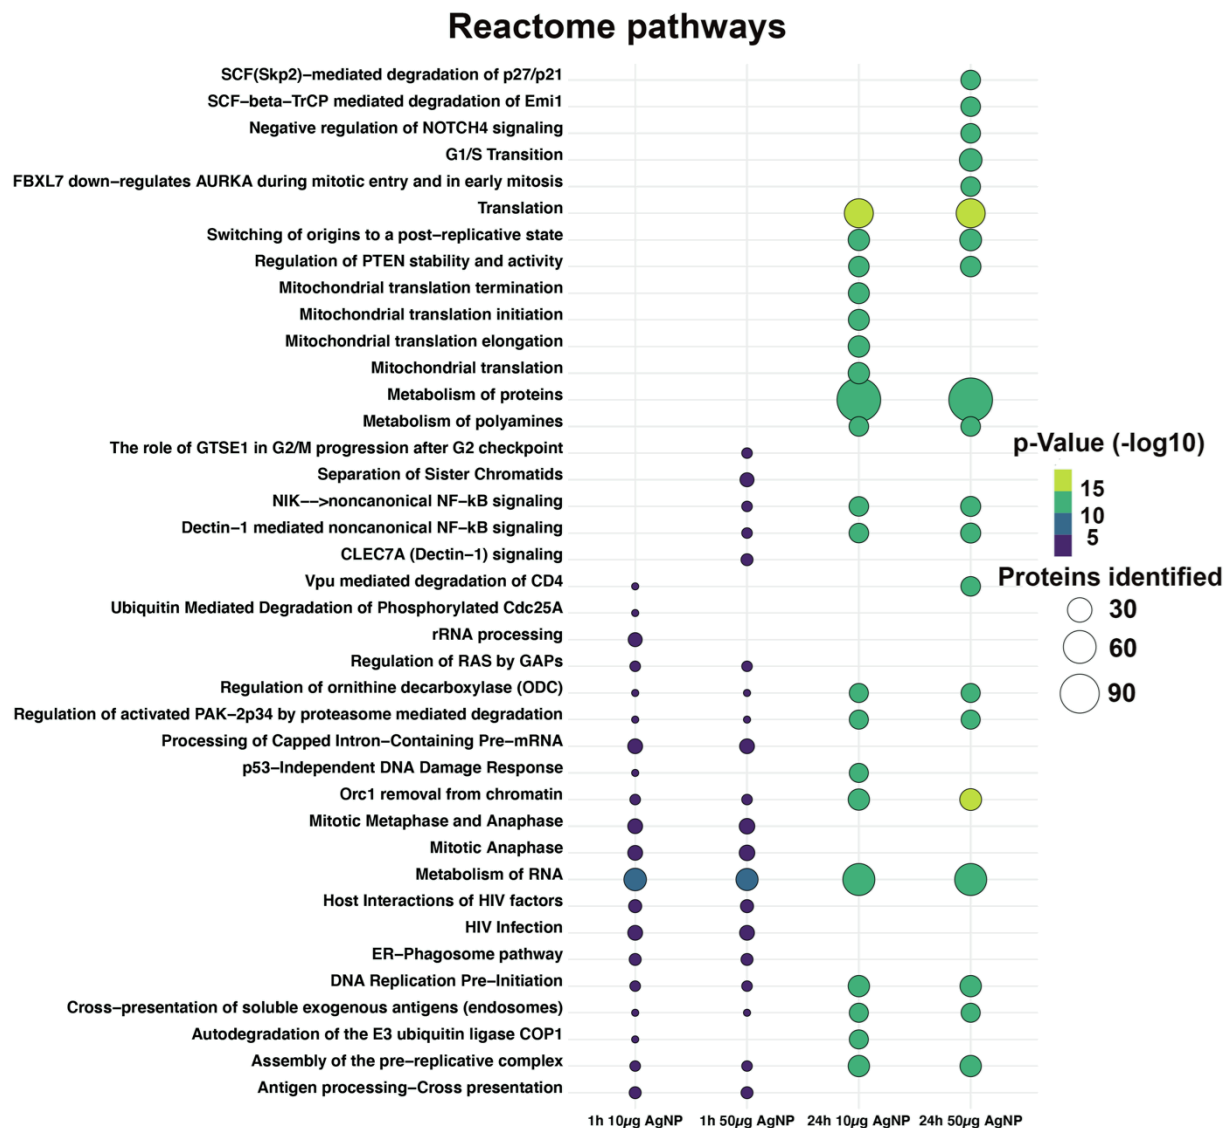

**Figure S4.** Reactome pathway functional enrichment analysis for the cellular protein corona after exposure of Calu-3 cells to 10 and 50 µg/cm<sup>2</sup> AgNPs for 1 and 24 h. Circle size reflects the number of proteins associated with each pathway. A minimum of 10 different proteins must be identified to validate a functional pathway. Only pathways significantly enriched in the corona are shown (p < 0.05).

**Table S2.** List of the 10 most abundant proteins in the acellular corona after 1 h incubation of 10 and 50  $\mu\text{g}$  AgNPs in the apical secretome of Calu-3 cells (E: extracellular, I: intracellular).

| Condition                               | Gene name | Accession | Extra-cellular | Intra-cellular | Description                                                   |
|-----------------------------------------|-----------|-----------|----------------|----------------|---------------------------------------------------------------|
| <b>10 <math>\mu\text{g}</math> AgNP</b> | PSMB3     | P49720    | E              | I              | Proteasome subunit beta type-3                                |
|                                         | PCBD1     | P61457    | E              | I              | Pterin-4-alpha-carbinolamine dehydratase                      |
|                                         | PSMB4     | P28070    | E              | I              | Proteasome subunit beta type-4                                |
|                                         | ANP32B    | Q92688    | E              | I              | Acidic leucine-rich nuclear phosphoprotein 32 family member B |
|                                         | MDK       | P21741    | E              |                | Midkine                                                       |
|                                         | EWSR1     | Q01844    |                | I              | RNA-binding protein EWS                                       |
|                                         | PCMT1     | P22061    | E              | I              | Protein-L-isoaspartate(D-aspartate) O-methyltransferase       |
|                                         | PSAT1     | Q9Y617    | E              | I              | Phosphoserine aminotransferase                                |
|                                         | API5      | Q9BZZ5    |                | I              | Apoptosis inhibitor 5                                         |
|                                         | FAH       | P16930    | E              | I              | Fumarylacetoacetase                                           |
| <b>50 <math>\mu\text{g}</math> AgNP</b> | EWSR1     | Q01844    |                | I              | RNA-binding protein EWS                                       |
|                                         | PSMB3     | P49720    | E              | I              | Proteasome subunit beta type-3                                |
|                                         | FKBP1A    | P62942    |                | I              | Peptidyl-prolyl cis-trans isomerase FKBP1A                    |
|                                         | ANP32B    | Q92688    | E              | I              | Acidic leucine-rich nuclear phosphoprotein 32 family member B |
|                                         | YBX1      | P67809    | E              | I              | Y-box-binding protein 1                                       |
|                                         | PCBD1     | P61457    | E              | I              | Pterin-4-alpha-carbinolamine dehydratase                      |
|                                         | TFPI      | P10646    | E              |                | Tissue factor pathway inhibitor                               |
|                                         | PSMB4     | P28070    | E              | I              | Proteasome subunit beta type-4                                |
|                                         | HMGB3     | O15347    |                | I              | High mobility group protein B3                                |
|                                         | KPNA4     | O00629    |                | I              | Importin subunit alpha-3                                      |

**Table S3.** List of the 10 most abundant proteins in the cellular corona after 1 h exposure of Calu-3 cells to 10 and 50  $\mu\text{g}/\text{cm}^2$  AgNPs (E: extracellular, I: intracellular).

| Condition                                               | Gene name | Accession | Extra-cellular | Intra-cellular | Description                                                 |
|---------------------------------------------------------|-----------|-----------|----------------|----------------|-------------------------------------------------------------|
| <b>10 <math>\mu\text{g}/\text{cm}^2</math><br/>AgNP</b> | RHOC      | P08134    | E              | I              | Rho-related GTP-binding protein RhoC                        |
|                                                         | DEK       | P35659    |                | I              | Protein DEK                                                 |
|                                                         | TAF15     | Q92804    |                | I              | TATA-binding protein-associated factor 2N                   |
|                                                         | NUP205    | Q92621    |                | I              | Nuclear pore complex protein Nup205                         |
|                                                         | STX7      | O15400    | E              | I              | Syntaxin-7                                                  |
|                                                         | NDUFB10   | O96000    |                | I              | NADH dehydrogenase 1 beta subcomplex subunit 10             |
|                                                         | CLDN4     | O14493    |                | I              | Claudin-4                                                   |
|                                                         | RCC2      | Q9P258    |                | I              | Protein RCC2                                                |
|                                                         | NDUFB6    | O95139    |                | I              | NADH dehydrogenase 1 beta subcomplex subunit 6              |
|                                                         | RPL36     | Q9Y3U8    |                | I              | 60S ribosomal protein L36                                   |
| <b>50 <math>\mu\text{g}/\text{cm}^2</math><br/>AgNP</b> | YBX1      | P67809    | E              | I              | Nuclease-sensitive element-binding protein 1                |
|                                                         | SLTM      | Q9NWH9    |                | I              | SAFB-like transcription modulator                           |
|                                                         | MTX1      | Q13505    |                | I              | Metaxin-1                                                   |
|                                                         | SUB1      | P53999    | E              | I              | Activated RNA polymerase II transcriptional coactivator p15 |
|                                                         | SEC61G    | P60059    |                | I              | Protein transport Sec61 subunit gamma                       |
|                                                         | RPL36     | Q9Y3U8    |                | I              | 60S ribosomal protein L36                                   |
|                                                         | EIF3E     | P60228    | E              | I              | Eukaryotic translation initiation factor 3 subunit E        |
|                                                         | SNRPD2    | P62316    | E              | I              | Small nuclear ribonucleoprotein Sm D2                       |
|                                                         | PPL       | O60437    | E              | I              | PPL                                                         |
|                                                         | NUP205    | NUP205    |                | I              | Nuclear pore complex protein                                |



**Table S4.** List of the 10 most abundant proteins in the cellular corona after 24 h exposure of Calu-3 cells to 10 and 50  $\mu\text{g}/\text{cm}^2$  AgNP (E: extracellular, EV: exosomes, I: intracellular).

| Condition                                           | Gene name | Accession | Extra-cellular | Intra-cellular | Description                                                   |
|-----------------------------------------------------|-----------|-----------|----------------|----------------|---------------------------------------------------------------|
| <b>10 <math>\mu\text{g}/\text{cm}^2</math> AgNP</b> | TUBB8     | Q3ZCM7    | E              | I              | Tubulin beta-8 chain                                          |
|                                                     | CYB5B     | H3BUX2    |                | I              | Cytochrome b5 type B                                          |
|                                                     | ALDOC     | P09972    | E              | I              | Fructose-bisphosphate aldolase C                              |
|                                                     | SF3A3     | Q12874    |                | I              | Splicing factor 3A subunit 3                                  |
|                                                     | C1QBP     | Q07021    |                | I              | Complement component 1 Q subcomponent-binding protein         |
|                                                     | HSP90AB2P | Q58FF8    | EV             | I              | Putative heat shock protein HSP 90-beta 2                     |
|                                                     | CCL20     | P78556    | E              |                | C-C motif chemokine 20                                        |
|                                                     | SAR1A     | Q9NR31    | EV             | I              | GTP-binding protein SAR1a                                     |
|                                                     | HCFC1     | A6NEM2    |                | I              | Host cell factor 1                                            |
|                                                     | SNRPD3    | P62318    |                | I              | Small nuclear ribonucleoprotein Sm D3                         |
| <b>50 <math>\mu\text{g}/\text{cm}^2</math> AgNP</b> | TUBB8     | Q3ZCM7    | E              | I              | Tubulin beta-8 chain                                          |
|                                                     | HSP90AB2P | Q58FF8    | EV             | I              | Putative heat shock protein HSP 90-beta 2                     |
|                                                     | SF3A3     | Q12874    |                | I              | Splicing factor 3A subunit 3                                  |
|                                                     | CYB5B     | H3BUX2    |                | I              | Cytochrome b5 type B                                          |
|                                                     | ALDOC     | P09972    | E              | I              | Fructose-bisphosphate aldolase C                              |
|                                                     | DDAH1     | O94760    | E              | I              | N(G),N(G)-dimethylarginine dimethylaminohydrolase1            |
|                                                     | UBE2I     | P63279    |                | I              | SUMO-conjugating enzyme UBC9                                  |
|                                                     | TXN       | P10599    |                | I              | Thioredoxin                                                   |
|                                                     | SSB       | P05455    |                | I              | Lupus La protein                                              |
|                                                     | ANP32A    | P39687    |                | I              | Acidic leucine-rich nuclear phosphoprotein 32 family member A |

**Table S5.** Proteins significantly overexpressed in the apical secretome of Calu-3 cells exposed to 50  $\mu\text{g}/\text{cm}^2$  AgNPs for 48 h, based on the datasets from [1] (E: extracellular, EV: exosomes, I: intracellular).

| Condition                                                             | Gene name | Accession | Extra-cellular | Intra-cellular | Description                                     |
|-----------------------------------------------------------------------|-----------|-----------|----------------|----------------|-------------------------------------------------|
| <b>Secretome<br/>50 <math>\mu\text{g}/\text{cm}^2</math><br/>AgNP</b> | SMPDL3B   | Q92485    | E/EV           |                | Acid sphingomyelinase-like phosphodiesterase 3b |
|                                                                       | VCL       | P18206    | E/EV           | I              | Vinculin                                        |
|                                                                       | CAP1      | Q01518    | E/EV           | I              | Adenylyl cyclase-associated protein 1           |
|                                                                       | HNRNPL    | P14866    | EV             | I              | Heterogeneous nuclear ribonucleoprotein L       |
|                                                                       | YWHAZ     | P63104    | E/EV           | I              | 14-3-3 protein zeta/delta                       |
|                                                                       | YWHAE     | P62258    | EV             | I              | 14-3-3 protein epsilon                          |
|                                                                       | GAPDH     | P04406    | EV             | I              | Glyceraldehyde-3-phosphate dehydrogenase        |
|                                                                       | EPRS      | P07814    |                | I              | Glutamate/proline-tRNA ligase                   |

**Table S6.** Proteins common to the protein corona formed *in situ* during Calu-3 exposure to AgNPs (50 µg/cm<sup>2</sup>, 24 h) and to the apical secretome of Calu-3 cells exposed to AgNPs (50 µg/cm<sup>2</sup>, 48 h), based on the dataset from [1]. Only proteins unique to cells exposed to AgNPs were considered.

| Condition                     | Gene name | Description                                                   |
|-------------------------------|-----------|---------------------------------------------------------------|
| 50 µg/cm <sup>2</sup><br>AgNP | SEC23A    | Protein transport Sec23A                                      |
|                               | KIF5B     | Kinesin-1 heavy chain                                         |
|                               | EIF5      | Translation initiation factor 5                               |
|                               | PCBD1     | Pterin-4-alpha-carbinolamine dehydratase                      |
|                               | HUWE1     | E3 ubiquitin-protein ligase                                   |
|                               | DIAPH1    | Protein diaphanous homolog 1                                  |
|                               | SMS       | Spermine synthase                                             |
|                               | UBE2L3    | Ubiquitin-conjugating enzyme                                  |
|                               | PSMC1     | 26S protease regulatory subunit 4                             |
|                               | SERPINB6  | Serpin B6                                                     |
|                               | GMDS      | GDP-mannose 4,6 dehydratase                                   |
|                               | PSMB1     | Proteasome subunit beta type-1                                |
|                               | PSMD7     | 26S proteasome non-ATPase regulatory subunit 7                |
|                               | ANP32A    | Acidic leucine-rich nuclear phosphoprotein 32 family member A |
|                               | C1QBP     | Complement component 1 Q subcomponent-binding protein         |
|                               | EIF3B     | Translation initiation factor 3 subunit B                     |
|                               | AHSA1     | Activator of 90 kDa heat shock protein ATPase homolog 1       |
|                               | TSTA3     | GDP-L-fucose synthase                                         |
|                               | NUTF2     | Nuclear transport factor 2                                    |
|                               | HSP90AB2P | Heat shock protein HSP 90-beta 2                              |

## References

1. Chivé C, Mc Cord C, Sanchez-Guzman D, Brookes O, Joseph P, Lai Kuen R, et al. 3D model of the bronchial epithelial barrier to study repeated exposure to xenobiotics: Application to silver nanoparticles. *Environ Toxicol Pharmacol.* 2023;103:104281; doi: 10.1016/j.etap.2023.104281.
